# Supplementary material for: From LI-RADS Classification to HCC Pathology: A Retrospective Single-Institution Analysis of Clinico-Pathological Features Affecting Oncological Outcomes after Curative Surgery
Source: MDPI journal article supplement (doi:10.3390/diagnostics12010160), 2022-01-10
Supplement: s1 [file s1]

Figure S1. Kaplan-Meier estimates of relapse-free survival.

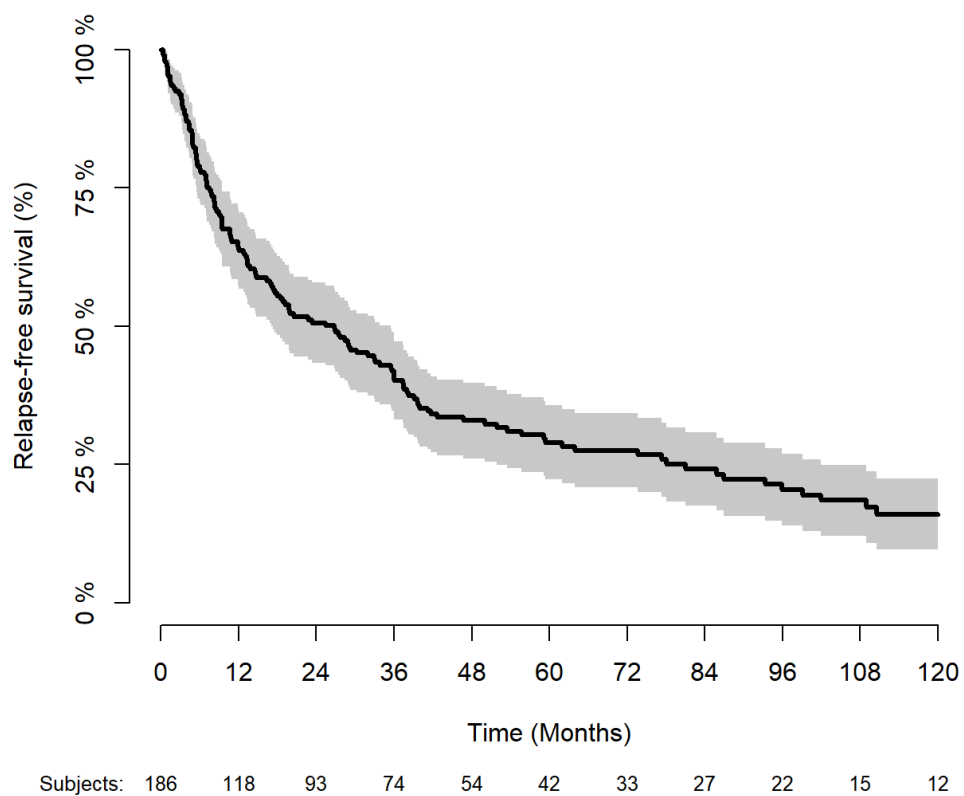

|   | time | n.risk | n.event | n.lost | surv  | se.surv | lower  | upper |
|---|------|--------|---------|--------|-------|---------|--------|-------|
| 1 | 12   | 118    | 0       | 0      | 0.642 | 0.0353  | 0.5729 | 0.711 |
| 2 | 24   | 93     | 0       | 0      | 0.506 | 0.0369  | 0.4339 | 0.578 |
| 3 | 36   | 74     | 0       | 0      | 0.407 | 0.0363  | 0.3363 | 0.478 |
| 4 | 48   | 54     | 0       | 0      | 0.329 | 0.0348  | 0.2608 | 0.397 |
| 5 | 60   | 42     | 0       | 0      | 0.289 | 0.0342  | 0.2225 | 0.357 |
| 6 | 120  | 12     | 0       | 0      | 0.160 | 0.0328  | 0.0961 | 0.224 |

Figure S2. Kaplan-Meier estimates of overall survival.

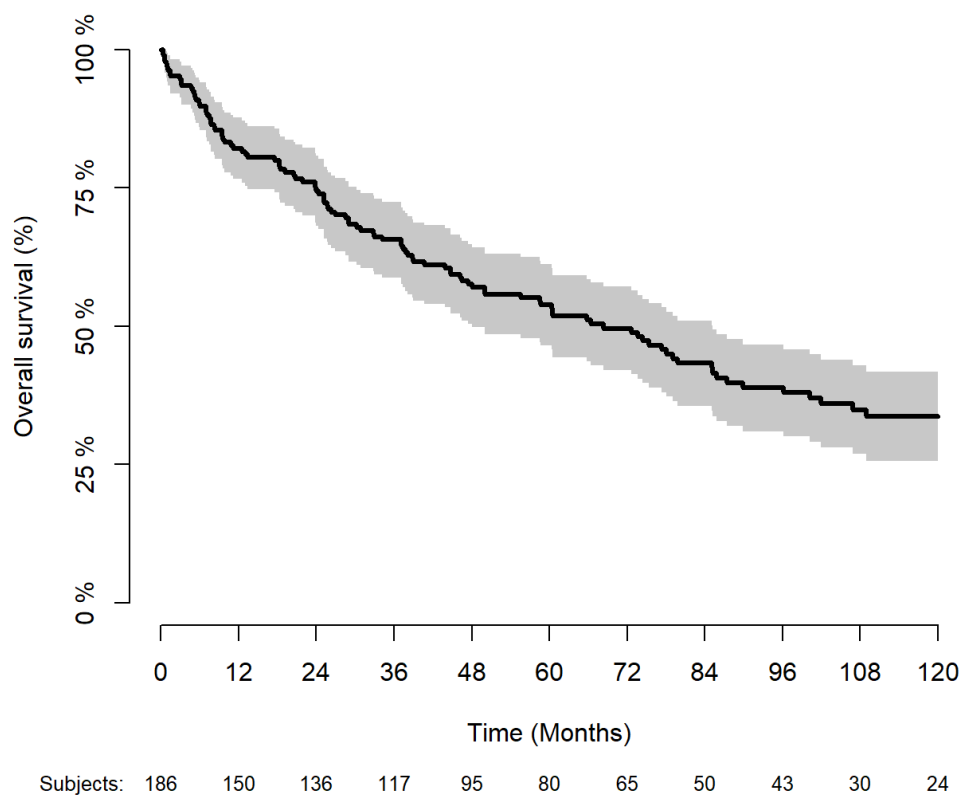

|   | time | n.risk | n.event | n.lost | surv  | se.surv | lower | upper |
|---|------|--------|---------|--------|-------|---------|-------|-------|
| 1 | 12   | 150    | 0       | 0      | 0.821 | 0.0282  | 0.766 | 0.876 |
| 2 | 24   | 136    | 0       | 0      | 0.744 | 0.0322  | 0.681 | 0.808 |
| 3 | 36   | 117    | 0       | 0      | 0.656 | 0.0351  | 0.587 | 0.725 |
| 4 | 48   | 95     | 0       | 0      | 0.576 | 0.0368  | 0.504 | 0.648 |
| 5 | 60   | 80     | 0       | 0      | 0.538 | 0.0375  | 0.464 | 0.612 |
| 6 | 120  | 24     | 0       | 0      | 0.337 | 0.0410  | 0.257 | 0.417 |

Figure S3. Aalen-Johansen crude incidence estimates of cancer-specific death (death for other causes as competing risk).

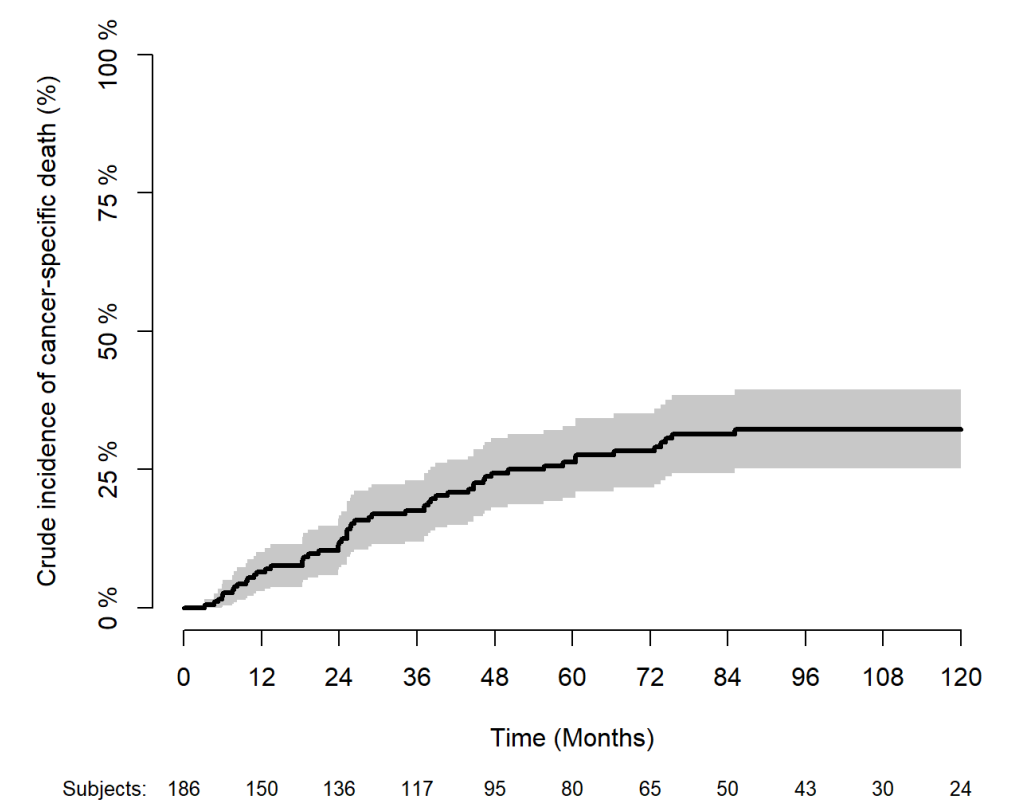

|   | time | n.risk | n.event | n.lost | cuminc | se.cuminc | lower  | upper |
|---|------|--------|---------|--------|--------|-----------|--------|-------|
| 1 | 12   | 150    | 0       | 0      | 0.0652 | 0.0182    | 0.0295 | 0.101 |
| 2 | 24   | 136    | 0       | 0      | 0.1199 | 0.0240    | 0.0729 | 0.167 |
| 3 | 36   | 117    | 0       | 0      | 0.1749 | 0.0281    | 0.1199 | 0.230 |
| 4 | 48   | 95     | 0       | 0      | 0.2437 | 0.0320    | 0.1810 | 0.306 |
| 5 | 60   | 80     | 0       | 0      | 0.2629 | 0.0331    | 0.1981 | 0.328 |
| 6 | 120  | 24     | 0       | 0      | 0.3230 | 0.0365    | 0.2514 | 0.395 |
